# Supplementary material for: Reversible changes in pancreatic islet structure and function produced by elevated blood glucose
Source: PubMed Central journal article supplement (PMC4143961; doi:10.1038/ncomms5639), 2014-08-22
Supplement: ncomms5639-s1.pdf [file ncomms5639-s1.pdf]

## Supplementary figure-1 Ashcroft

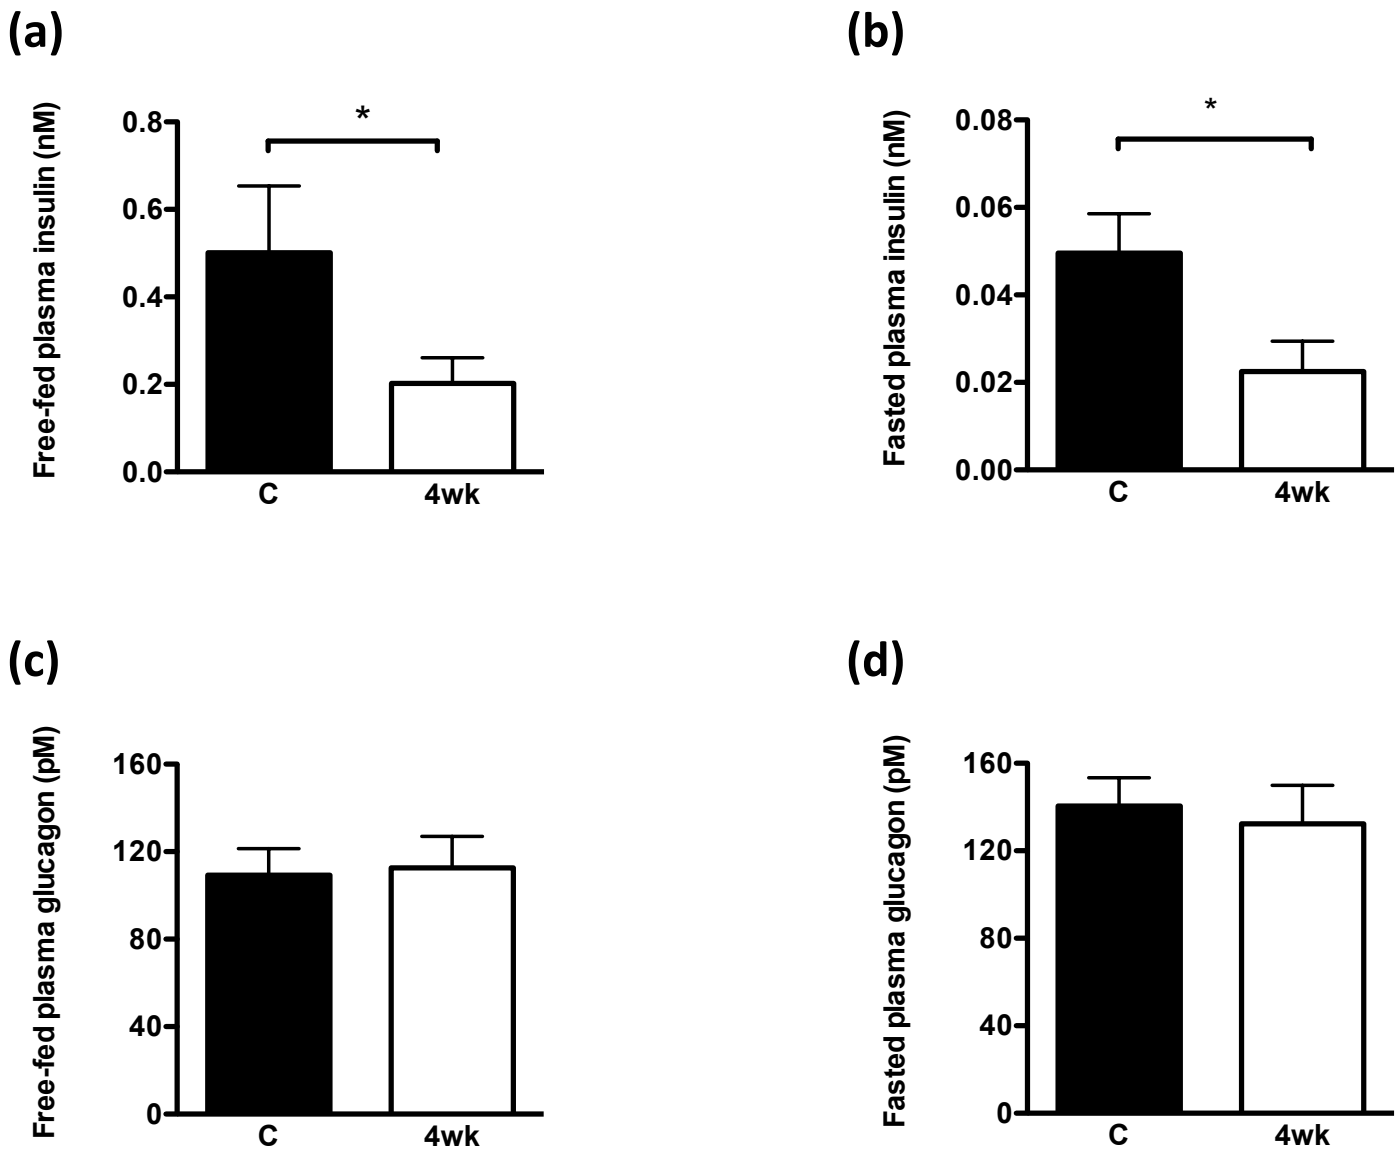

Supplementary figure 1: Plasma insulin and glucagon levels following gene induction

**a,b.** Mean±SEM free-fed (**a**) and fasted (**b**) plasma insulin levels for control mice (C, n=8-10) and 4-week-diabetic  $\beta$ V59M mice (4wk, n=6-9). **c,d.** Mean±SEM free-fed (**C**) and fasted (**D**) plasma glucagon levels for control mice (C, n=8-10) and 4-week-diabetic  $\beta$ V59M mice (4wk, n=6-9). \* $P < 0.05$ ; Mann-Whitney test.

## Supplementary figure-2 Ashcroft

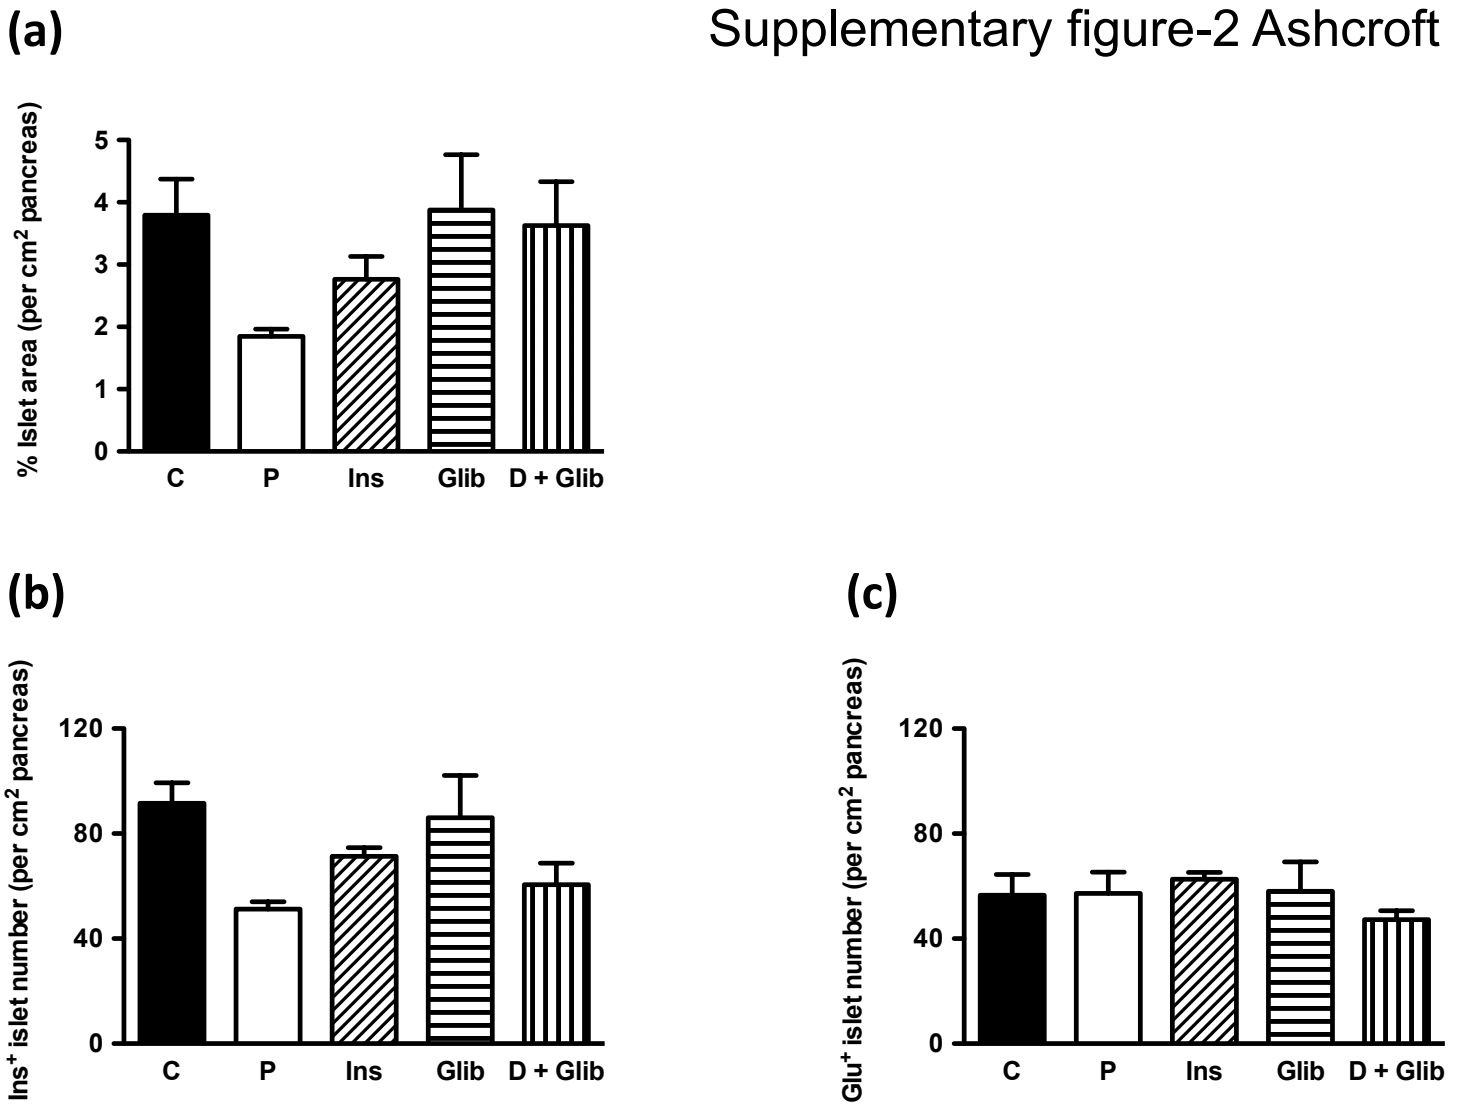

*Supplementary figure 2: Chronic hyperglycaemia does not alter islet density*

Islet area per cm<sup>2</sup> of pancreas (**a**) and number of insulin-positive (**b**) and glucagon-positive (**c**) islets (mean±SEM of 3-6 mice per genotype;  $P>0.05$  compared to placebo; One-way ANOVA). After gene induction and elevation of blood glucose (< 20 mM)  $\beta$ V59M mice were implanted for 4 weeks with either placebo (P), insulin (Ins) or glibenclamide (Glib) pellets, or were implanted with glibenclamide pellets following 4 weeks of hyperglycaemia (P+Glib).

## Supplementary figure-3 Ashcroft

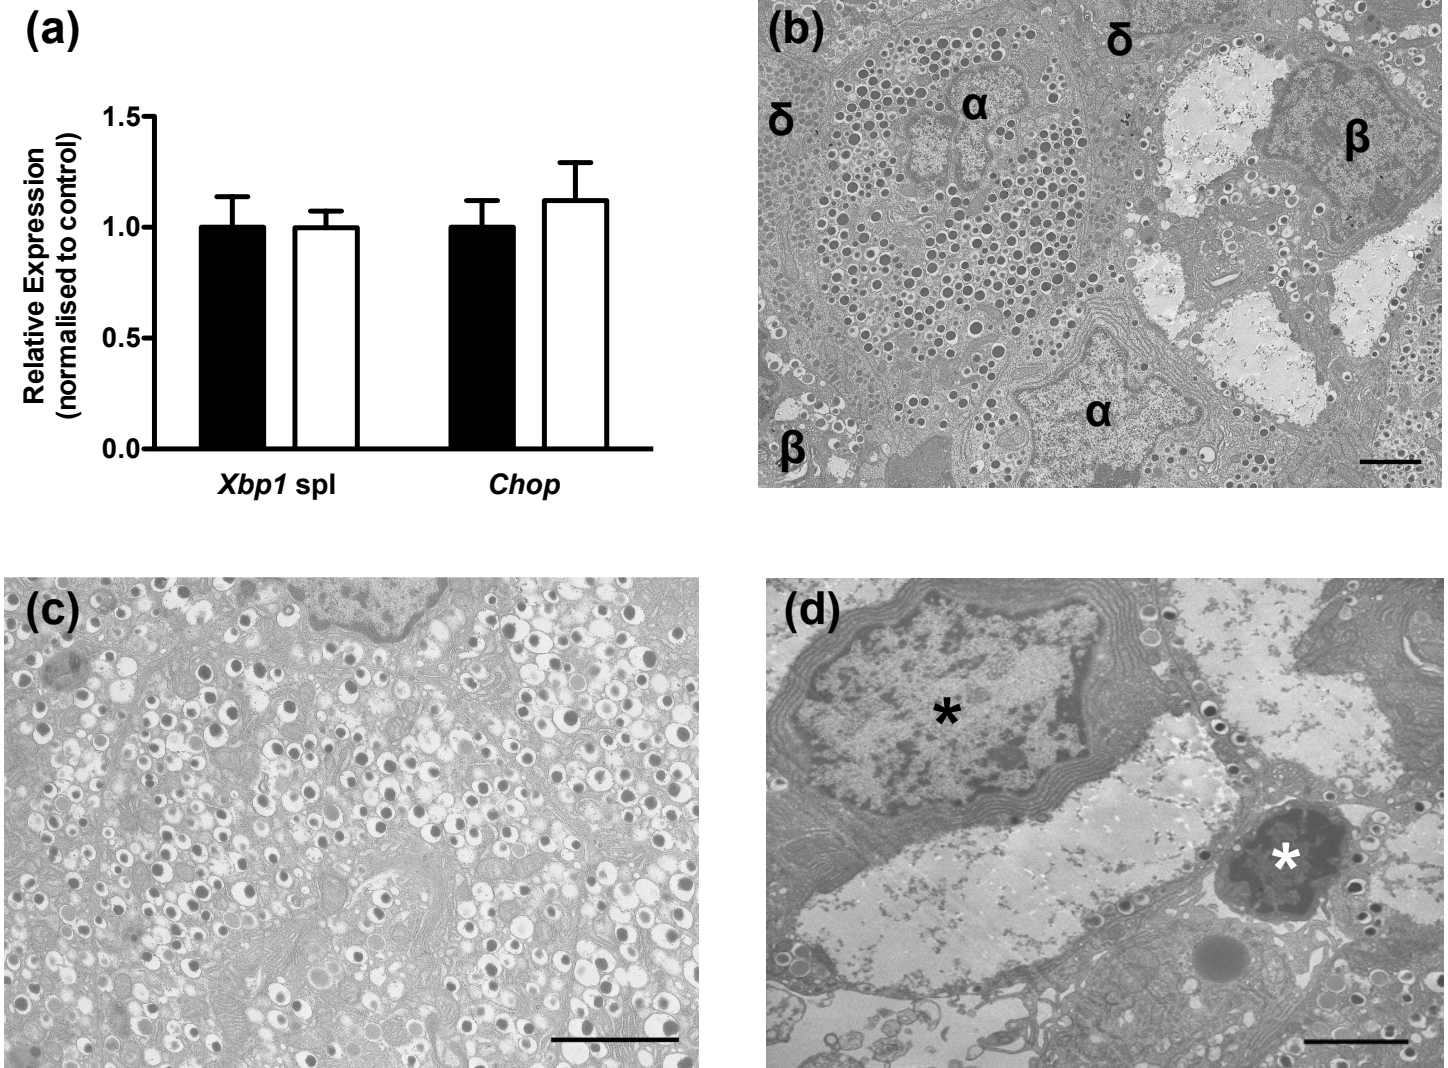

### Supplementary figure 3: Effects of immediate and long-term gene induction on $\beta$ -cell ultrastructure

**a.** *Xbp1* spliced and *Chop* mRNA levels in islets isolated from control (black bars) and 4-week-diabetic  $\beta$ V59M mice (white bars) ( $P > 0.05$ ; Mann-Whitney test;  $n = 5-6$  mice per genotype). Representative electron micrographs of pancreatic sections from  $\beta$ V59M mice exposed to hyperglycaemia for 4 weeks (**b**) and following gene induction and 24 h of established diabetes (**c**; >20 mM glucose). Alpha ( $\alpha$ ) beta ( $\beta$ ) and delta ( $\delta$ ) cells are indicated. **d.** Electron micrograph of pancreatic section from a 4-week-diabetic  $\beta$ V59M islet with an example of an apoptotic nucleus with condensed chromatin (white \*) compared to a non-apoptotic nucleus (black \*). Scale bars 2  $\mu$ m.

## Supplementary figure-4 Ashcroft

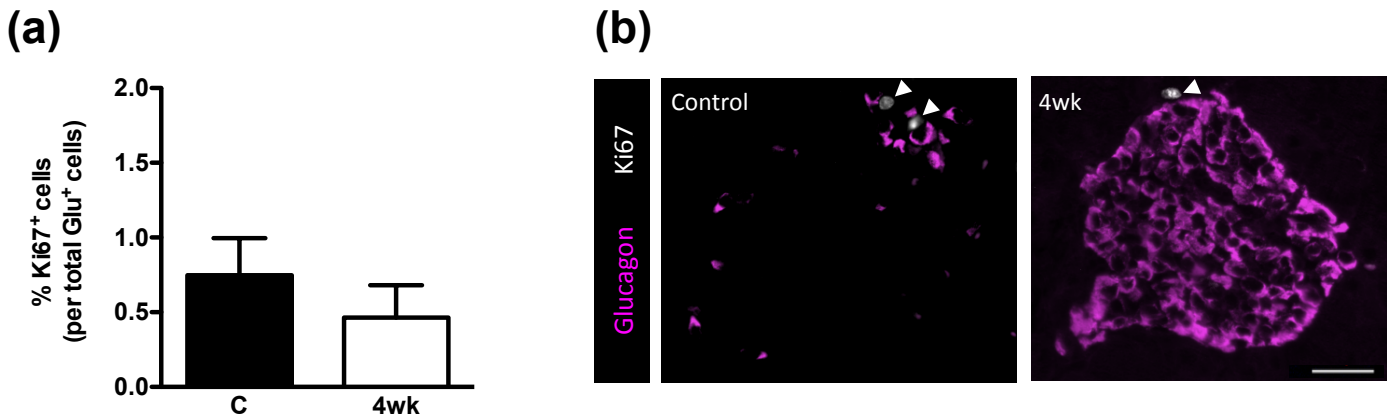

*Supplementary figure 4: Chronic hyperglycaemia does not affect  $\alpha$ -cell proliferation*

**a.** Percentage of cells positive for both glucagon and Ki67, expressed as a percentage of the total number of glu<sup>+</sup> cells ( $P > 0.05$ ; Mann-Whitney test;  $n = 3000-5000$  glu<sup>+</sup> cells;  $n = 130-190$  islets;  $n = 3-4$  mice per genotype). **b.** Representative example of glu<sup>+</sup> cells (pink) and Ki67<sup>+</sup> nuclei (white arrow head) in control and 4-week-diabetic  $\beta V59M$  islets. Scale bar, 50 $\mu$ m.

## Supplementary figure-5 Ashcroft

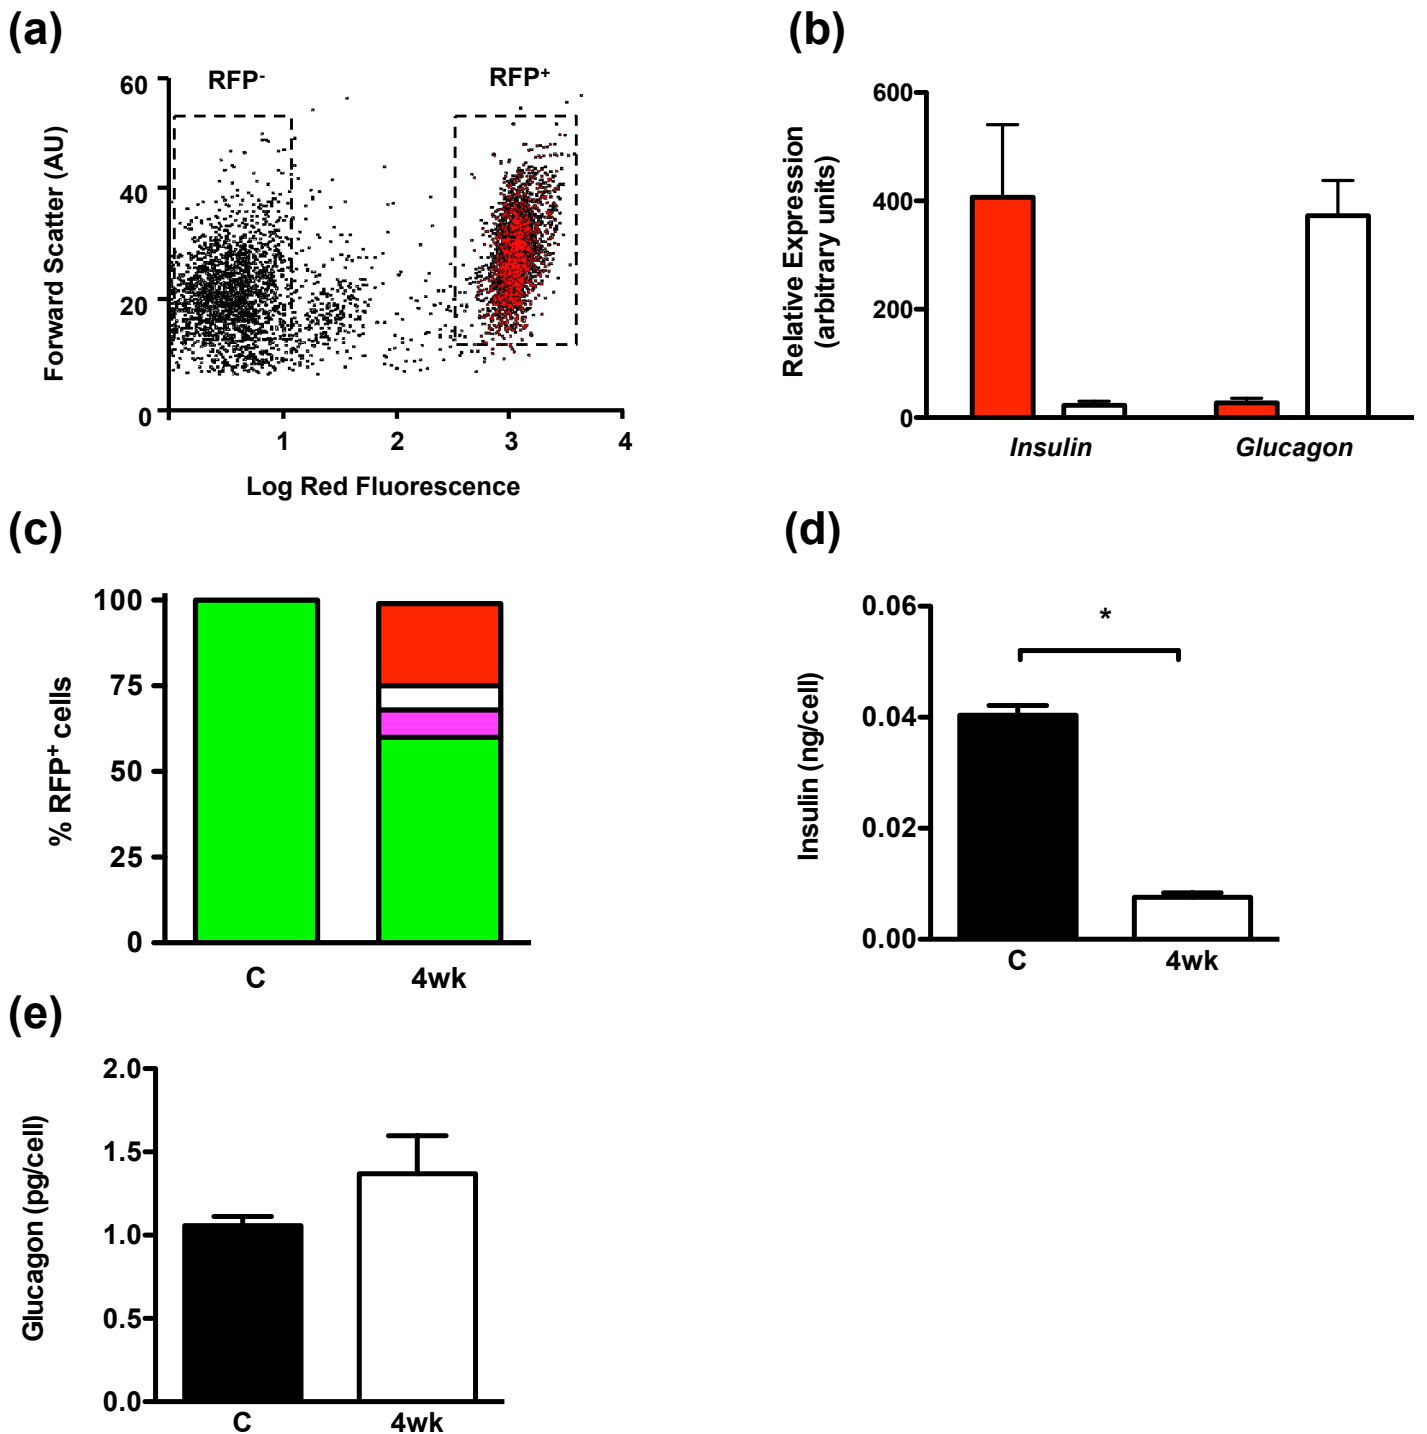

Supplementary figure 5: RFP fluorescence enables FAC sorting of pancreatic  $\beta$ -cells

Dispersed pancreatic islet cells from  $\beta$ -RFP and 4-week-diabetic  $\beta$ V59M-RFP mice were analysed by FAC sorting. **(a)** Representative example of a  $\beta$ -RFP FAC sort. Red fluorescence was measured by excitation at 560 nm and emission at 585/29 nm and plotted against forward scatter in arbitrary units (AU). Boxed areas indicate cells taken for analysis. **(b)** RFP<sup>+</sup> (black bars) and RFP<sup>-</sup> (white bars) cells separated from  $\beta$ -RFP mice express insulin and glucagon respectively. **(c)** Quantification of the percentage of RFP<sup>+</sup> mouse islets that express insulin (green), glucagon (pink), insulin and glucagon (white), or do not contain detectable levels of either insulin or glucagon (red) in  $\beta$ -RFP (C) and 4-week-diabetic  $\beta$ V59M-RFP mice (4wk). (n=300-400 cells; n=3-4 mice per genotype). **(d,e)** Insulin content of RFP<sup>+</sup> cells **(d)** and glucagon protein content of RFP<sup>-</sup> cells **(e)** from  $\beta$ -RFP and 4-week-diabetic  $\beta$ V59M-RFP mice (mean  $\pm$  SEM,  $P > 0.05$ ; Mann-Whitney test; n=4-5 mice per genotype).

## Supplementary figure-6 Ashcroft

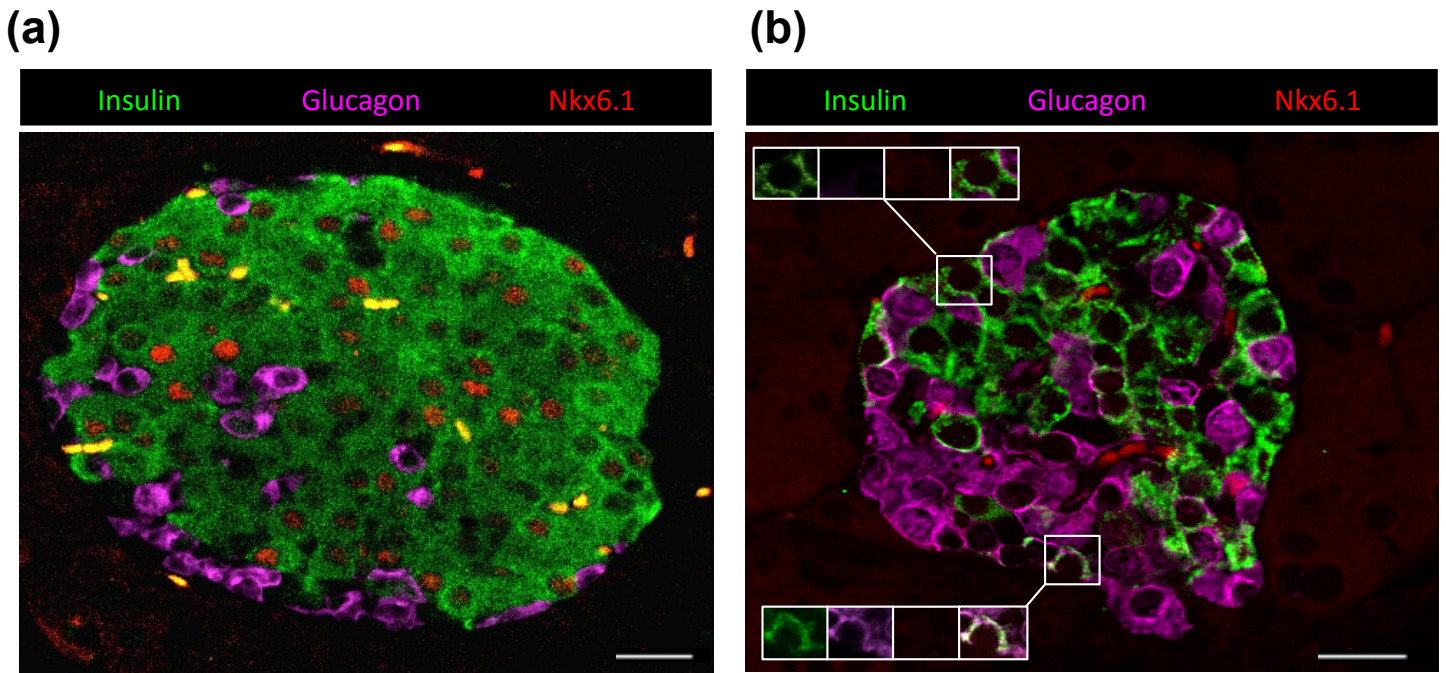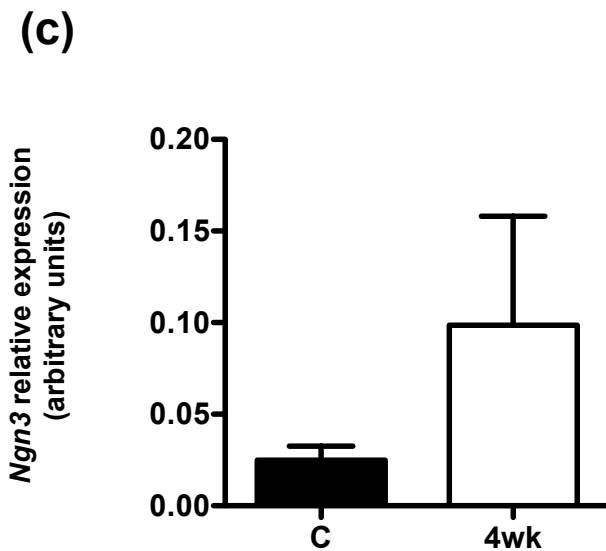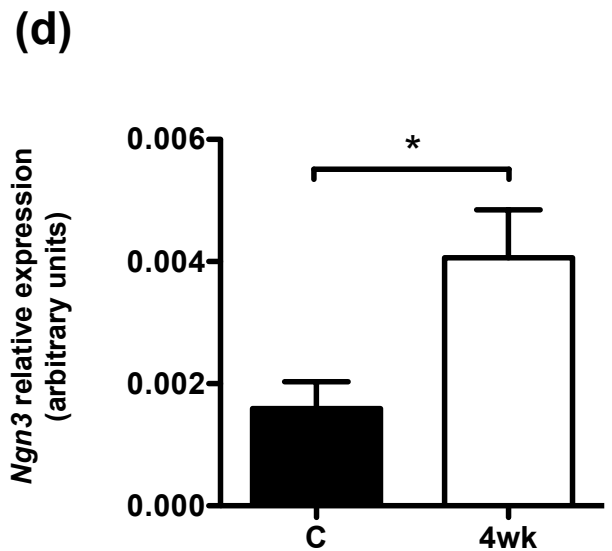

Supplementary figure 6: Transcription factor profile of diabetic  $\beta V59M$  islets.

**a,b.** Representative example of immunofluorescence staining for Nkx6.1 (red), insulin (green), and glucagon (pink) in a control islet. Scale bar 50 $\mu$ m. **c,d.** *Ngn3* mRNA levels in isolated islets (**c**) and FAC-sorted RFP<sup>+</sup> cells (**d**) from control mice (black bars) and 4-week-diabetic  $\beta V59M$  mice (white bars) (Mean  $\pm$  SEM, \*  $P < 0.05$ ; Mann-Whitney test; n=5-6 mice per genotype).

| SYBR Green Primers  |                                                              |
|---------------------|--------------------------------------------------------------|
| Gene                | Sequence (5' to 3')                                          |
| <i>Actb</i>         | F: GCAGCTCCTTCGTTGCCGGT<br>R: TACAGCCCGGGGAGCATCGT           |
| <i>Arx</i>          | F: TCCGGATACCCCACTTAGCTT<br>R: GACGCCCTTTCCTTTAAGTG          |
| <i>CHOP</i>         | F: AGCCTGGTATGAGGATCTGCAG<br>R: GGTCAAGAGTAGTGAAGGTTTTTGATTC |
| <i>Gfp</i>          | F: CGGCGACGTAAACGGCCACA<br>R: CAGCTTGCCGGTGGTGCAGA           |
| <i>Glucagon</i>     | F: ACCTGGACTCCCGCCGTGC<br>R: TCGCCTTCCTCGGCCTTTCACCAGCC      |
| <i>Glut2</i>        | F: TCTTCACGG CTGTCTCTGTG<br>R: AATCATCCCGTTAGGAACA           |
| <i>Hprt1</i>        | F: CCGGCAGCGTTTCTGAGCCA<br>R: GCTCGCGGCAAAAAGCGGTC           |
| <i>Hspa8</i>        | F: CAGCGCAGCTGGGCCTACAC<br>R: TAGCTTGCGTGGTGC GGTT           |
| <i>Insulin</i>      | F: GCATCCSGTAACCCCCAGCCC<br>R: CAGGGCCAGCAGGGGTAGGA          |
| <i>MafA</i>         | F: CAGCAGCGGCACATTCTG<br>R: GCCCGCCA ACTTCTCGTAT             |
| <i>MafB</i>         | F: AGGACCTGTACTGGATGGC<br>R: CACTACGGAAGCCGTCGAAG            |
| <i>Ngn3</i>         | F: TCTCAAGCATCTCGCCTCTTC<br>R: ACAGCAAGGGTACCGATGAGA         |
| <i>Nkx6.1</i>       | F: AGAGAGCAGGCTTGGCCTATTC<br>R: GTCGTCAGAGTTCGGGTCCAG        |
| <i>Pax6</i>         | F: AAACAAACGCCCTAGCTCTCC<br>R: CCGCCCTTGGTTAAAGTCCTC         |
| <i>Pdx1</i>         | F: CAGTGGGCAGGAGGTGCTTA<br>R: GCCCGGGTGTAGGCAGTAC            |
| <i>Xbp1 spliced</i> | F: CTGAGTCCGAATCAGGTGCAG<br>R: GTCCATGGGAAGATGTTCTGG         |

Supplementary Table 1: SYBR green primer sequences for the indicated genes.

| <b>Antibody</b>                  | <b>Concentration</b> | <b>Source</b>                 |
|----------------------------------|----------------------|-------------------------------|
| <i>Guinea pig anti-insulin</i>   | 1:500                | Made in house                 |
| <i>Mouse anti-glucagon</i>       | 1:500                | Sigma (2645)                  |
| <i>Mouse anti-Pdx1</i>           | 1:50                 | DHDB (F6A11)                  |
| <i>Rabbit anti-Ki67</i>          | 1:50                 | Thermo Scientific (RM 9106S1) |
| <i>Rabbit anti-dsRed</i>         | 1:100                | Clontech (632496)             |
| <i>Anti-guinea pig HRP</i>       | 1:50                 | Dako (P0141)                  |
| <i>Anti-guinea pig Alexa 633</i> | 1:200                | Molecular Probes (A21105)     |
| <i>Anti-guinea pig Texas red</i> | 1:50                 | Vector Laboratories (TI-7000) |
| <i>Anti-mouse Alexa 633</i>      | 1:500                | Molecular Probes (A-21046)    |
| <i>Anti-mouse Cy3</i>            | 1:500                | Jackson Laboratories          |
| <i>Anti-mouse Alexa 488</i>      | 1:200                | Jackson Laboratories          |
| <i>Anti-mouse HRP</i>            | 1:50                 | Vector Laboratories (PI-2000) |
| <i>Anti-rabbit Alexa 568</i>     | 1:200                | Molecular Probes (A11037)     |
| <i>Streptavidin Alexa 488</i>    | 1:500                | Molecular Probes (S11223)     |
| <i>Rabbit-anti MafA</i>          | 1:50                 | Bethyl Laboratories           |
| <i>Rabbit anti-MafB</i>          | 1:25                 | Bethyl Laboratories           |
| <i>Rabbit anti-Glut2</i>         | 1:15                 | Santa Cruz (sc-9117)          |
| <i>Rabbit anti-glucagon</i>      | 1:1000               | Abcam (ab92517)               |
| <i>Mouse-anti-Nkx6.1</i>         | 1:50                 | DHDB (F55A12-c)               |

*Supplementary Table 2: Antibodies.*



| <b>Taqman Primers</b> |                                                                                                           |
|-----------------------|-----------------------------------------------------------------------------------------------------------|
| <b>Gene</b>           | <b>Sequence (5' to 3')</b>                                                                                |
| <i>Arx</i>            | Mm00545903_m1 (Applied Biosystems)                                                                        |
| <i>Beta actin</i>     | Mm00607939_s1 (Applied Biosystems)                                                                        |
| <i>Glucagon</i>       | Mm01269055_m1 (Applied Biosystems)                                                                        |
| <i>Glut2</i>          | Mm00446224_m1 (applied Biosystems)                                                                        |
| <i>Insulin</i>        | Primer 1: AACCCACCCAGGCTTTTGTC<br>Primer 2: CTTCTCCCAGCTCCAGTTGTTC<br>Probe: GGCTCTCTACCTGGTGTGTGGGGAGCGT |
| <i>MafA</i>           | Mm00845209_s1 (Applied Biosystems)                                                                        |
| <i>MafB</i>           | Mm00627481_s1 (Applied Biosystems)                                                                        |
| <i>Ngn3</i>           | Mm00437606_s1 (Applied Biosystems)                                                                        |
| <i>Nkx6.1</i>         | Mm00454962_m1 (Applied Biosystems)                                                                        |
| <i>Pdx1</i>           | Mm00435565_m1 (Applied Biosystems)                                                                        |

*Supplementary Table 3: Taqman primer sequences for the indicated genes.*
